# Supplementary material for: Violence across the Life Course and Implications for Intervention Design: Findings from the Maisha Fiti Study with Female Sex Workers in Nairobi, Kenya
Source: MDPI journal article supplement (doi:10.3390/ijerph20116046), 2023-06-03
Supplement: s1 [file s1]

**Table S1. Multivariable logistic regression – associations with recent physical or sexual violence by an Intimate Partner**

|          |                                                        |                   | N (%*)     | Crude Odds Ratio<br>(95% CI) | Adjusted Odds Ratio**<br>(95% CI) | P-<br>value*** |
|----------|--------------------------------------------------------|-------------------|------------|------------------------------|-----------------------------------|----------------|
| Model 1  | Age (years)                                            | 18-24             | 212 (31.1) | Ref                          | Ref                               | 0.2            |
|          |                                                        | 25-34             | 353 (34.6) | 1.17 (0.82-1.67)             | 1.20 (0.83-1.73)                  |                |
|          |                                                        | 35-45             | 438 (28.5) | 0.88 (0.62-1.25)             | 0.90 (0.63-1.31)                  |                |
|          | Total number of<br>Adverse<br>Childhood<br>Experiences | 0-4               | 282 (20.8) | Ref                          | Ref                               | <0.001         |
|          |                                                        | 5-8               | 548 (32.8) | 1.85 (1.33-2.59)             | 1.78 (1.26--2.50)                 |                |
|          |                                                        | 9-12              | 173 (43.6) | 2.94 (1.95-4.44)             | 2.79 (1.83-4.27)                  |                |
| Model 2  | Sexual debut<br>forced                                 | Consented         | 695 (30.1) | Ref                          | Ref                               | 0.6            |
|          |                                                        | Tricked/Pressured | 194 (31.4) | 1.07 (0.76-1.50)             | 0.93 (0.65-1.33)                  |                |
|          |                                                        | Forced            | 110 (37.7) | 1.41 (0.93-2.12)             | 1.17 (0.77-1.79)                  |                |
| Model 3A | Current Intimate<br>Partner                            | No                | 392 (8.6)  | Ref                          | Ref                               | <0.001         |
|          |                                                        | Yes               | 610 (46.3) | 9.14 (6.25-13.38)            | 10.12 (6.71-15.25)                |                |
|          | Number of<br>people dependent<br>on her income         | 0-1               | 178 (25.7) | Ref                          | Ref                               | 0.5            |
|          |                                                        | 2-3               | 475 (32.6) | 1.40 (0.95-2.05)             | 1.13 (0.71-1.81)                  |                |
|          |                                                        | 4+                | 350 (31.7) | 1.34 (0.90-2.01)             | 0.93 (0.57-1.52)                  |                |
|          | Additional<br>income to sex<br>work                    | No                | 571 (27.3) | Ref                          | Ref                               | 0.07           |
|          |                                                        | Yes               | 432 (36.3) | 1.52 (1.16-1.98)             | 1.32 (0.97-1.78)                  |                |
|          | Recent hunger<br>past 7 days                           | No                | 670 (29.0) | Ref                          | Ref                               | 0.1            |
|          |                                                        | Yes               | 331 (35.4) | 1.35 (1.02-1.77)             | 1.31 (0.94-1.82)                  |                |
| Model 3B | Street based sex<br>work                               | No                | 705 (31.0) | Ref                          | Ref                               | 0.8            |
|          |                                                        | Yes               | 294 (31.7) | 1.03 (0.78-1.38)             | 0.96 (0.71-1.31)                  |                |
|          | Condom use last<br>sex (any partner)                   | No                | 236 (41.6) | Ref                          | Ref                               | 0.001          |
|          |                                                        | Yes               | 765 (28.1) | 0.55 (0.41-0.74)             | 0.58 (0.42-0.80)                  |                |

|          |                                             |                 |            |                  |                  |       |
|----------|---------------------------------------------|-----------------|------------|------------------|------------------|-------|
| Model 3C | Current Prep, PEP or ARV use                | No              | 540 (35.5) | Ref              | Ref              | 0.006 |
|          |                                             | Yes             | 450 (26.7) | 0.66 (0.51-0.87) | 0.67 (0.50-0.89) |       |
|          | Police Arrest past 6 months                 | No              | 701 (28.5) | Ref              | Ref              | 0.03  |
|          |                                             | Yes             | 302 (37.5) | 1.51 (1.14-1.99) | 1.43 (1.05-1.95) |       |
|          | Depression or Anxiety score (PHQ-9 / GAD-7) | Low             | 481 (22.4) | Ref              | Ref              | 0.02  |
|          |                                             | Mild            | 279 (41.1) | 2.42 (1.77-3.33) | 2.22 (1.58-3.12) |       |
|          |                                             | Moderate/Severe | 243 (36.8) | 2.02 (1.45-2.82) | 1.40 (0.95-2.04) |       |
|          | Alcohol risk score (WHO ASSIST)             | Low 0-10        | 697 (25.9) | Ref              | Ref              | 0.001 |
|          |                                             | Moderate 11-26  | 207 (40.7) | 1.96 (1.42-2.71) | 1.50 (1.05-2.14) |       |
|          |                                             | High 27+        | 95 (48.8)  | 2.73 (1.77-4.21) | 2.06 (1.28-2.32) |       |
|          | Social support                              | Not CBO member  | 907 (30.3) | Ref              | Ref              | 0.1   |
|          |                                             | Belongs to CBO  | 96 (39.9)  | 1.53 (1.00-2.35) | 1.46 (0.92-2.33) |       |

\*Proportion with the outcome \*\* For comparison, the same variables were adjusted for in each of the three violence outcome analyses (any recent physical or sexual violence; any physical or sexual violence by an intimate partner; any recent physical or sexual violence by a non-intimate partner. Model 1 models adjusted for age, and number of ACEs. Model 2 models adjusted for level 1 variables, and sexual debut. Model 3a models were adjusted for level 1 and 2 variables, along with level 3a variables shown in the Table. Model 3b models were adjusted for level 1 and 2 variables, along with level 3b variables shown in the Table. Model 3c models were adjusted for level 1 and 2 variables, along with level 3c variables shown in the Table. \*\*\*Adjusted Wald Test. Where variables were ordered categorical, we show the Test for Trend.

**Table S2. Multivariable logistic regression – associations with recent physical or sexual violence by a non-Intimate Partner**

|          |                                                        |                   | N (%*)     | Crude Odds Ratio<br>(95% CI) | Adjusted Odds Ratio**<br>(95% CI) | P-<br>value*** |
|----------|--------------------------------------------------------|-------------------|------------|------------------------------|-----------------------------------|----------------|
| Model 1  | Age (years)                                            | 18-24             | 212 (51.4) | Ref                          | Ref                               | 0.6            |
|          |                                                        | 25-34             | 353 (58.9) | 1.36 (0.97-1.90)             | 1.48 (1.03-2.14)                  |                |
|          |                                                        | 35-45             | 438 (54.1) | 1.11 (0.81-1.54)             | 1.31 (0.91-1.88)                  |                |
|          | Total number of<br>Adverse<br>Childhood<br>Experiences | 0-4               | 282 (32.6) | Ref                          | Ref                               | <0.001         |
|          |                                                        | 5-8               | 548 (60.5) | 3.17 (2.35-4.28)             | 3.15 (2.33-4.26)                  |                |
|          |                                                        | 9-12              | 173 (78.7) | 7.67 (4.98-11.82)            | 7.48 (4.82-11.62)                 |                |
| Model 2  | Sexual debut<br>forced                                 | Consented         | 695 (49.8) | Ref                          | Ref                               | <0.001         |
|          |                                                        | Tricked/Pressured | 194 (64.3) | 1.82 (1.31-2.52)             | 1.54 (1.10-2.17)                  |                |
|          |                                                        | Forced            | 110 (75.8) | 3.17 (2.01-4.99)             | 2.46 (1.51-4.00)                  |                |
| Model 3A | Current Intimate<br>Partner                            | No                | 392 (57.9) | Ref                          | Ref                               | 0.5            |
|          |                                                        | Yes               | 610 (54.1) | 0.86 (0.67-1.10)             | 0.91 (0.69-1.21)                  |                |
|          | Number of<br>people dependent<br>on her income         | 0-1               | 178 (46.0) | Ref                          | Ref                               | 0.02           |
|          |                                                        | 2-3               | 475 (53.0) | 1.32 (0.94-1.87)             | 1.20 (0.80-1.78)                  |                |
|          |                                                        | 4+                | 350 (63.5) | 2.04 (1.41-2.95)             | 1.59 (1.04-2.43)                  |                |
|          | Additional<br>income to sex<br>work                    | No                | 571 (61.8) | Ref                          | Ref                               | <0.001         |
|          |                                                        | Yes               | 432 (47.8) | 0.56 (0.44-0.73)             | 0.53 (0.40-0.70)                  |                |
|          | Recent hunger<br>past 7 days                           | No                | 670 (49.2) | Ref                          | Ref                               | 0.01           |
|          |                                                        | Yes               | 331 (68.5) | 2.25 (1.71-2.96)             | 1.43 (1.08- 1.96)                 |                |
| Model 3B | Street based sex<br>work                               | No                | 705 (52.4) | Ref                          | Ref                               | 0.01           |
|          |                                                        | Yes               | 294 (63.8) | 1.60 (1.22-2.11)             | 1.48 (1.08-2.01)                  |                |
|          | Condom use last<br>sex (any partner)                   | No                | 236 (58.7) | Ref                          | Ref                               | 0.3            |
|          |                                                        | Yes               | 765 (54.7) | 0.85 (0.63-1.14)             | 0.83 (0.59-1.17)                  |                |

|          |                                             |                 |            |                  |                  |        |
|----------|---------------------------------------------|-----------------|------------|------------------|------------------|--------|
| Model 3C | Current Prep, PEP or ARV use                | No              | 540 (53.3) | Ref              | Ref              | 0.1    |
|          |                                             | Yes             | 450 (58.3) | 1.22 (0.95-1.56) | 1.24 (0.93-1.66) |        |
|          | Police Arrest past 6 months                 | No              | 701 (48.1) | Ref              | Ref              | <0.001 |
|          |                                             | Yes             | 302 (72.9) | 2.91 (2.17-3.88) | 2.32 (1.69-3.17) |        |
|          | Depression or Anxiety score (PHQ-9 / GAD-7) | Low             | 481 (49.8) | Ref              | Ref              | 0.6    |
|          |                                             | Mild            | 279 (53.1) | 1.14 (0.85-1.53) | 0.90 (0.64-1.26) |        |
|          |                                             | Moderate/Severe | 243 (69.6) | 2.31 (1.67-3.19) | 1.17 (0.80-1.72) |        |
|          | Alcohol risk score (WHO ASSIST)             | Low 0-10        | 697 (49.6) | Ref              | Ref              | <0.001 |
|          |                                             | Moderate 11-26  | 207 (63.5) | 1.77 (1.29-2.43) | 1.33 (0.93-1.90) |        |
|          |                                             | High 27+        | 95 (84.6)  | 5.57 (3.21-9.66) | 3.92 (2.19-6.99) |        |
|          | Social support                              | Not CBO member  | 907 (54.3) | Ref              | Ref              | 0.03   |
|          |                                             | Belongs to CBO  | 96 (68.8)  | 1.86 (1.19-2.89) | 1.66 (1.04-2.64) |        |

\*Proportion with the outcome \*\* For comparison, the same variables were adjusted for in each of the three violence outcome analyses (any recent physical or sexual violence; any physical or sexual violence by an intimate partner; any recent physical or sexual violence by a non-intimate partner. Model 1 models adjusted for age, and number of ACEs. Model 2 models adjusted for level 1 variables, and sexual debut. Model 3a models were adjusted for level 1 and 2 variables, along with level 3a variables shown in the Table. Model 3b models were adjusted for level 1 and 2 variables, along with level 3b variables shown in the Table. Model 3c models were adjusted for level 1 and 2 variables, along with level 3c variables shown in the Table. \*\*\*Adjusted Wald Test. Where variables were ordered categorical, we show the Test for Trend.
